# Supplementary material for: STK11 (LKB1) missense somatic mutant isoforms promote tumor growth, motility and inflammation
Source: PubMed Central journal article supplement (PMC7347935; doi:10.1038/s42003-020-1092-0), 2020-07-09
Supplement: 42003_2020_1092_MOESM2_ESM.pdf [file 42003_2020_1092_MOESM2_ESM.pdf]

## **Descriptions of Additional Supplementary Files**

**Supplementary data 1:** Proteins detected by mass spectrometry in secretomes before and after the expression of the different LKB1 isoforms. Samples are showed in triplicates.

**Supplementary data 2:** Proteins differentially detected by mass spectrometry in secretomes after the expression of the different LKB1 isoforms.

**Supplementary data 3:** List of the common proteins identified in the secretomes obtained from cells expressing the different LKB1 isoforms (Fig. 5A)
